# Supplementary material for: Efficacy of a chitosan tampon in the loop electrosurgical excision procedure: A prospective randomized controlled study
Source: PubMed Central journal article supplement (PMC7138841; doi:10.1038/s41598-020-62965-1), 2020-04-07
Supplement: 41598_2020_62965_MOESM1_ESM.pdf [file 41598_2020_62965_MOESM1_ESM.pdf]

**Efficacy of a chitosan tampon in the loop electrosurgical excision procedure: A prospective randomized controlled study**

Gun Oh Chong<sup>1,2,\*,+</sup>, Yoon Hee Lee<sup>1,2+</sup>, Se Young Jeon<sup>2</sup>, Hee-Young Yang<sup>3</sup>,  
and Sang-Hyun An<sup>3</sup>

<sup>1</sup>Department of Obstetrics and Gynecology, School of Medicine, Kyungpook National University, Daegu, 41944, Republic of Korea

<sup>2</sup>Department of Obstetrics and Gynecology, Kyungpook National University Chilgok Hospital, Daegu, 41404, Republic of Korea

<sup>3</sup>Laboratory Animal Center, Daegu-Gyeongbuk Medical Innovation Foundation, Daegu, 41061, Republic of Korea

\*corresponding author gochong@knu.ac.kr

+these authors contributed equally to this work as co-first authors

Supplementary table 1. Five questionnaires for evaluating vaginal discharge, impairment of daily living, and abdominal pain using the visual analogue scale.

| Questionnaires                                                             | None of<br>the time | A little<br>of the<br>time | Some of<br>the time | Most of<br>the time | All of<br>the time |
|----------------------------------------------------------------------------|---------------------|----------------------------|---------------------|---------------------|--------------------|
| Interfered with your physical activity?                                    | 1                   | 2                          | 3                   | 4                   | 5                  |
| Made you concerned about soiling<br>your underwear?                        | 1                   | 2                          | 3                   | 4                   | 5                  |
| Made you feel that it was difficult to<br>carry out your usual activities? | 1                   | 2                          | 3                   | 4                   | 5                  |
| Interfered with your social activities?                                    | 1                   | 2                          | 3                   | 4                   | 5                  |
| How much bodily pain have you had?                                         | 1                   | 2                          | 3                   | 4                   | 5                  |
